## A127

**Title:** DOES LAPAROSCOPIC CHOLECYSTECTOMY PREVENT POSTOPERATIVE PULMONARY FUNCTION DETERIORATION?

**Authors:** A.P. Reed, MD, D. Han, M.D., I.H. Sampson, MD

**Affiliation:** Dept of Anes, Mt Sinai Sch of Med, NYC

Upper abdominal surgery such as cholecystectomy is associated with significant reduction in postoperative lung volumes (1) which lead to atelectasis, pneumonia, and hypoxemia. Laparoscopic cholecystectomy performed through an abdominal stab wound obviates the need for an incision. We undertook a prospective study to compare postoperative pulmonary function tests between patients undergoing laparotomy and laparoscopy for cholecystectomy.

After institutional review board approval, patient consents were obtained. Pulmonary effects of cholecystectomy were assessed following laparotomy in 8 patients and laparoscopy in 11 patients. Vital capacity (VC), forced vital capacity (FVC), forced expiratory flow (FEF<sub>25-75%</sub>) and maximum voluntary ventilation (MVV) were measured in the sitting position both preoperatively and one day postoperatively using bedside spirometry. During the postoperative interview pain was assessed employing a standard visual analogue scale. Patients with obesity, age greater than 60 years, history of smoking or history of lung disease were excluded. All surgery was performed under general anesthesia utilizing varying amounts of thiamylal, midazolam, droperidol, inhalational agents, and muscle relaxants. Narcotics were restricted to fentanyl and doses were limited to less than 5 mcg/kg. Using each patient as his own control, data was collected and calculated as a percent of the predicted value based on age and height, then analyzed using student's t-test. A p<0.05 was considered statistically significant.

VC, FVC, MVV fell significantly more following laparotomy than laparoscopy. VC, FVC, MVV decreased 37±15%, 37±11%, 39±10%, respectively following laparotomy compared to 7±9%, 15±15%, 20±9% respectively following laparoscopy. Visual analogue pain scale evaluations in both groups were similar. Consequently, we are able to eliminate the influence of a postoperative pain differential on our results.

The data confirm a significant depression of lung volumes following laparotomy and substantially less depression of lung volumes after laparoscopy. Post-laparotomy diaphragmatic dysfunction may account for the observed differences (2). Because reduced postoperative lung volumes are associated with atelectasis, pneumonia and hypoxemia, it is reasonable to assume that post-laparoscopic cholecystectomy patients are at considerably less risk for these complications than post-laparotomy patients.

1. J Clin Invest 12:651, 1932
2. Anesthesiology 68:379, 1988

Table  
Preoperative vs Postoperative Pulmonary Function Tests  
as Per Cent of Predicted Value\*

| Test                                     | Laparotomy Group |                 | Laparoscopy Group |                 |
|------------------------------------------|------------------|-----------------|-------------------|-----------------|
|                                          | Preoperatively   | Postoperatively | Preoperatively    | Postoperatively |
| Vital Capacity                           | .75              | .36             | .84               | .77             |
| Forced Vital Capacity                    | .74              | .36             | .80               | .65             |
| Forced Expiratory Flow <sub>25-75%</sub> | .85              | .39             | .85               | .59             |
| Maximum Voluntary Ventilation            | .67              | .29             | .69               | .48             |

\*The P value for vital capacity is 0.0005; for forced vital capacity is 0.0040; for forced expiratory flow<sub>25-75%</sub> is 0.0055; and for maximum voluntary ventilation is 0.0006.

## A128

**TITLE:** EFFECT OF CHANGES IN PCO<sub>2</sub> ON THE MATCHING OF VENTILATION AND PERFUSION IN NORMAL LUNGS.

**AUTHORS:** KB Domino, MD; BL Eisenstein, MA; YM Lu, MD; ER Swenson, MD; MP Hlastala, PhD.

**AFFILIATION:** Departments of Anesthesiology, Physiology and Biophysics, and Medicine. University of Washington, Seattle, WA, 98195.

Pulmonary shunting is often increased in hyperventilated anesthetized patients(1). In contrast, mild hypercapnia may enhance gas exchange(2). We studied the effects of changes in PCO<sub>2</sub> and the influence of method of hyperventilation (increased respiratory rate [RR] versus tidal volume [TV]) on the matching of ventilation (VA) and perfusion (Q) in dogs, using the multiple inert gas elimination technique. We hypothesized that hypocapnia would impair VA/Q matching.

**Methods:** 8 pentobarbital-anesthetized, closed-chested dogs were hyperventilated with FIO<sub>2</sub> = 0.21 by increased TV (TV = 30 ml/kg at 18 breaths/min) or increased RR (TV = 18 ml/kg at 35 breaths/min). Inspired CO<sub>2</sub> was added to change PaCO<sub>2</sub> to 20, 35, and 52 mmHg. The order of type of ventilation and PaCO<sub>2</sub> level was randomized. A dilute solution of six inert gases (SF<sub>6</sub>, ethane, cyclopropane, halothane, diethyl ether, and acetone) was infused to assess gas exchange. Arterial and mixed venous blood gases and inert gases, mixed expired inert gases, and hemodynamics were measured. VA/Q mismatch (heterogeneity) was assessed by shunt (QS/QT), dead space (VD/VT), log standard deviation of perfusion (log SDQ) and ventilation (log SDV) distributions and arterial-alveolar difference ((a-A)D) area. Data were analyzed by a two-factor within subjects analysis of variance, paired comparison t test, and Duncan test.

**Results:** When hypocapnia was achieved by high RR ventilation, VA/Q mismatch was increased, indicated by increases in (a-A)D area with low PaCO<sub>2</sub> compared to normal PaCO<sub>2</sub> (see table). In contrast, hypocapnia did not affect VA/Q matching with increased TV ventilation. Hypercapnia did not affect VA/Q heterogeneity with either type of ventilation. Increased TV ventilation reduced VD/VT and log SDV, but otherwise did not affect gas exchange during normocapnia. Ppa, QT, and QS/QT were unchanged.

Table. Gas exchange measurements.

|                          | QS/QT(%)  | VD/VT(%) | log SDQ    | log SDV  | (a-A)D area |
|--------------------------|-----------|----------|------------|----------|-------------|
| <b>Increased RR</b>      |           |          |            |          |             |
| Low PaCO <sub>2</sub>    | 0.1 ± 0.0 | 36 ± 4   | 0.81 ± .06 | 1.4 ± .1 | 0.47 ± .04* |
| Normal PaCO <sub>2</sub> | 0.1 ± 0.0 | 37 ± 3   | 0.75 ± .05 | 1.2 ± .1 | 0.37 ± .05  |
| High PaCO <sub>2</sub>   | 0.1 ± 0.1 | 35 ± 3   | 0.75 ± .05 | 1.2 ± .1 | 0.39 ± .06  |

#### Increased Tv

|                          |           |         |            |           |             |
|--------------------------|-----------|---------|------------|-----------|-------------|
| Low PaCO <sub>2</sub>    | 0.1 ± 0.0 | 31 ± 3* | 0.75 ± .05 | 0.9 ± .1* | 0.29 ± .04* |
| Normal PaCO <sub>2</sub> | 0.2 ± 0.1 | 28 ± 3* | 0.75 ± .05 | 1.0 ± .1* | 0.32 ± .04  |
| High PaCO <sub>2</sub>   | 0.3 ± 0.2 | 27 ± 3* | 0.75 ± .05 | 1.0 ± .1  | 0.32 ± .04  |

Means ± SE are presented. \*P < 0.05 versus normal PaCO<sub>2</sub>;

\*P < 0.05 versus increased RR at same PaCO<sub>2</sub>

**Conclusion:** We conclude that hypocapnia increases VA/Q mismatch in dogs with normal lungs, when hyperventilation is achieved with a rapid RR, but not a large TV. Because increased lung volume may reduce the effect of CO<sub>2</sub> on collateral ventilation(3), the lack of effect of hypocapnia on VA/Q matching with large TV ventilation suggests the importance of hypoxic bronchoconstriction in mediating hypocapnia-induced VA/Q mismatch in dogs.

**References:** 1) Michenfelder JD: *J Appl Physiol* 21:1471, 1966. 2) Swenson ER: *FASEB J* 2:A924, 1988. 3) Ingram RH: *J Appl Physiol* 40:720, 1976. Supported by B.B. Sankey Anesthesia Advancement Award, NHLBI Clinical Investigator Award (#HL02507), and HL12174.
